# Supplementary material
Source: publisher site journal article supplement (https://www.dovepress.com/article/300267)
Supplement: Supplementary file 1 [file get_supplementary_file.php]

**Supplement Figure**


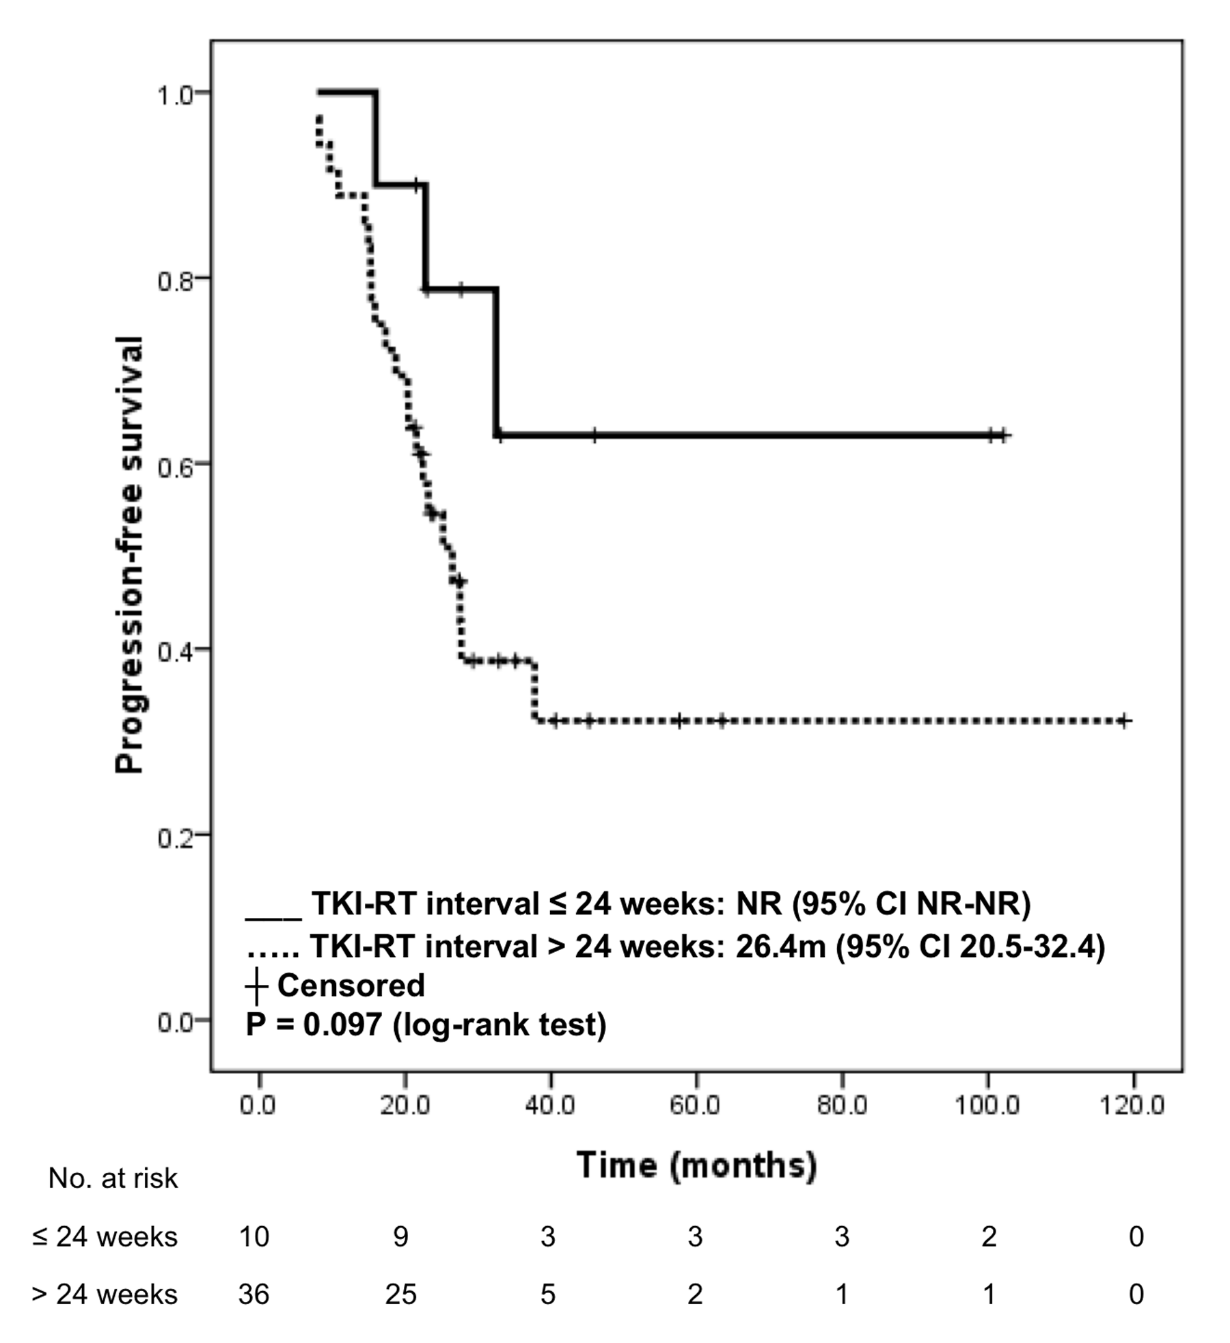


**Figure legends**

Progression-free survival in the radiotherapy-treatment group following an EGFR-TKI to radiotherapy interval few or more than 24 weeks. TKI, tyrosine kinase inhibitor; RT, radiotherapy; CI, confidence interval; NR, not reached
